# Supplementary material for: Biodiversity of Secondary Metabolites Compounds Isolated from Phylum Actinobacteria and Its Therapeutic Applications
Source: MDPI journal article supplement (doi:10.3390/molecules26154504), 2021-07-26
Supplement: s1 [file s1]

## Supplementary Material

Review

# Biodiversity of Secondary Metabolites Compounds Isolated from Phylum Actinobacteria and Its Therapeutic Applications

Muhanna Mohammed Al-shaibani <sup>1,2</sup>, Radin Maya Saphira Radin Mohamed <sup>1,\*</sup>, Nik Marzuki Sidik <sup>3,\*</sup>, Hesham Ali El Enshasy <sup>4,5</sup>, Adel Al-Gheethi <sup>1,\*</sup>, Efaq Noman <sup>6</sup>, Nabil Ali Al-Mekhlafi <sup>7,8</sup> and Noraziah Mohamad Zin <sup>2</sup>

- <sup>1</sup> Micro-Pollutant Research Centre (MPRC), Faculty of Civil Engineering and Built Environment, Universiti Tun Hussein Onn Malaysia, Parit Raja 86400, Johor, Malaysia; muhanna@uthm.edu.my
- <sup>2</sup> Center for Diagnostic, Therapeutic and Investigative Studies, Faculty of Health Sciences, Universiti Kebangsaan Malaysia, Kuala Lumpur 50300, Malaysia; noraziah.zin@ukm.edu.my
- <sup>3</sup> Faculty of Agro-Based Industry, Universiti Malaysia Kelantan, Jeli 17600, Kelantan, Malaysia
- <sup>4</sup> Institute of Bioproducts Development (IBD), Universiti Teknologi Malaysia (UTM), Skudai 81310, Johor, Malaysia; henshasy@ibd.utm.my
- <sup>5</sup> City of Scientific Research and Technology Applications (SRTA), 21934 New Burg Al Arab, Alexandria, Egypt
- <sup>6</sup> Applied Microbiology Department, Faculty of Applied Sciences, Taiz University; Taiz 6803, Yemen; hw160052@siswa.uthm.edu.my
- <sup>7</sup> Atta-ur-Rahman Institute for Natural Product Discovery, UiTM, Puncak Alam Campus, Bandar Puncak Alam 42300, Selangor, Malaysia; nabilali7@tu.edu.ye
- <sup>8</sup> Biochemical Technology Program, Department of Chemistry Faculty of Applied Science, Tamar University, Tamar P.O. Box 87246, Yemen
- \* Correspondence: maya@uthm.edu.my (R.M.S.R.M.); nikmarzuki@umk.edu.my (N.M.S.); adel@uthm.edu.my (A.A.-G.)

**Table S1.** Historically isolation of bioactive compounds from Actinobacteria

| Compound                                | Producer                                                   | Source        | Uses                          | Reference |
|-----------------------------------------|------------------------------------------------------------|---------------|-------------------------------|-----------|
| Actinomycin D (1)                       | <i>Streptomyces</i>                                        | Soil bacteria | Anticancer                    | [1]       |
| Streptomycin (2)                        | <i>Streptomyces</i>                                        | Soil bacteria | Anti T.B                      | [2]       |
| Gramicidin (3)                          | <i>Streptomyces</i>                                        | Soil bacteria | Antimicrobial                 | [3]       |
|                                         | <i>S. venezuelae</i>                                       | Soil bacteria | Antimicrobial                 | [4]       |
|                                         | <i>S. omiyaensis</i>                                       | Soil bacteria | Antimicrobial                 | [5]       |
| Chloramphenicol (CAP) (4)               | <i>Streptosporangium viridogriseum</i> var <i>kofuense</i> | Soil bacteria | Antimicrobial                 | [6]       |
|                                         | actinomycetes isolated from soil                           | Soil bacteria | Antimicrobial                 | [7]       |
| Cephamycins C (5)                       | <i>S. lactamdurang</i>                                     | Soil bacteria | Antimicrobial                 | [8]       |
| Fumaramidmycin (6)                      | <i>S. kurssanovii</i>                                      | soil bacteria | Antimicrobial                 | [9]       |
| Crisamicins C (7)                       | <i>Micromonospora purpurea chromogenes</i>                 | soil bacteria | Antimicrobial                 | [10].     |
| Polyene Antibiotics (PA-5 And PA- 7 (8) | <i>Streptoverticillium</i> sp. 43/16                       | soil bacteria | Antimicrobial                 | [11]      |
| Phospholine (10)                        | <i>S. hygroscopicus</i> .                                  | soil bacteria | Anticancer                    | [12]      |
| Simocyclinones D4 (11 A)                | <i>S. antibioticus</i> Tii 6040                            | soil bacteria | Anticancer& Antimicrobial     | [13]      |
| Simocyclinones D8 (11 B)                |                                                            |               |                               |           |
| Fistupyrone (12)                        | <i>streptomyces</i> sp. TP                                 | soil bacteria | Anti. Alteraniria baeassicila | [14]      |
| Streptocidins A-D (13)                  | <i>Streptomyces</i> sp. Tii 6071                           | soil bacteria | Antimicrobial                 | [15]      |
| Cedarmycin A (14-A)                     | <i>S. TP- A0456</i>                                        | twig of cedar | Antimicrobial                 | [16]      |
| B (14-B)                                |                                                            |               |                               |           |
| Kakadumycin A (15)                      | <i>S. sp. NRRL 30566</i>                                   | soil bacteria | Anti.MRSA                     | [17]      |
| Munumbicins E-4 And E-5 (16)            | <i>S. NRRL3052</i>                                         | soil bacteria | Anti.MRSA                     | [18]      |

Abbreviations: N.C: Not classified; MDRB, Multidrug resistant bacteria. *S. Streptomyces*, (PK) polyketide

**Table S2.** List of antifungal, growth promoting, antitumor and antiparasitic bioactive compounds, chemical classification and their application which isolated from Actinobacteria.

| Antifungal     | Producer                                    | Chemical class     | References |
|----------------|---------------------------------------------|--------------------|------------|
| Candididin     | <i>S. griseus</i>                           | polyene macrolide  | [19]       |
| Natamycin      | <i>S. nataensis</i>                         | tetraene polyene   | [20]       |
| Nystatine      | <i>S. noursei</i>                           | polyene macrolide  | [21]       |
| Polyoxins      | <i>S. cacaoi var asoensis</i>               | Nucleoside peptide | [22]       |
| Avermectin     | <i>S. avermitilis</i>                       | Macrolide          | [23]       |
| Hygromycin B   | <i>S. hygrosopicus</i>                      | Aminoglycoside     | [24]       |
| Milbemycin     | <i>S. argilaceus</i>                        | Macrolide          | [25]       |
| Amphotericin B | <i>S. nodosus.</i>                          | PKS*               | [26]       |
| Lasalocid      | <i>S. lasaliensis</i>                       | Polyether          | [27]       |
| Monensin       | <i>S. cinnamonesis</i>                      | Polyether          | [28]       |
| Bambermycin    | <i>S. bambergiensis</i>                     | Aminoglycoside     | [29]       |
| Nosiheptide    | <i>S. actuosus</i>                          | Thiopeptide        | [30]       |
| Sterptothricin | <i>S. lavendulae</i>                        | N-Glycoside        | [31]       |
| Thiostrepton   | <i>S. azureus</i>                           | Thiopeptide        | [32]       |
| Tylosin        | <i>S. fradiae</i>                           | Macrolide (PK)*    | [33]       |
| Virginamycin   | <i>S. virginiae</i>                         | (PK*)              | [34]       |
| Salinomycin    | <i>S. albus</i>                             | Polyether (PK*)    | [35]       |
| Actinomycin D  | <i>Streptomyces lannensis</i><br>T1317-0309 | Peptide            | [36]       |
| Adriamycin     | <i>S. peucetius</i>                         | Anthracycline      | [37]       |
| Bleomycin      | <i>S. verticillus</i>                       | Glycopeptide       | [38]       |
| Mithramycin    | <i>S. argilaceus</i>                        | Aureolic acid      | [39]       |
| Mitomycin C    | <i>S. caespitosus</i>                       | Benzoquinone       | [40]       |
| Actinomycins D | <i>S. sp. ZZ338</i>                         | polypeptide        | [41]       |

Abbreviations: N.C: Not classified; MDRB, Multidrug resistant bacteria. *S. Streptomyces*, (PK) polyketide

**Table S3.** Terrestrial and rhizosphere Actinobacteria isolation and screening for their antimicrobial activity.

| Bioactive Compound                                                                                                                                             | Producer                                                                                                                            | Chemical Class                     | Bioactivity                        | Source of isolation                 | References |
|----------------------------------------------------------------------------------------------------------------------------------------------------------------|-------------------------------------------------------------------------------------------------------------------------------------|------------------------------------|------------------------------------|-------------------------------------|------------|
| Cyclohexane, Butyl Propyl Ester, And 2,3-Heptanedione.                                                                                                         | S. SUK 08                                                                                                                           | N. C                               | Antimalarial Drug                  | Soil                                | [42]       |
| <i>cyclo</i> -(tryptophanyl-propyl) chloramphenicol.                                                                                                           | S. SUK 25                                                                                                                           | Diketopiperazine Protein Inhibitor | Anti- MRA                          | Soil. <i>Zingiber spectabile</i>    | [43]       |
| <i>cyclo</i> -(L-Val-L-Pro), <i>cyclo</i> -(L-Leu-L-Pro), <i>cyclo</i> -(L-Phe-L-Pro), <i>cyclo</i> -(L-Val-L-Phe), and N-(7-hydroxy-6-methyl-octyl)-acetamide | S. SUK 25                                                                                                                           | Diketopiperazine                   | Anti- MRA                          | Soil. <i>Zingiber spectabile</i>    | [44]       |
| Several compounds                                                                                                                                              | S. SCA3-4                                                                                                                           | N. C                               | MDRB &Pathogenic filamentous fungi | rhizosphere soil, China             | [45]       |
| Unknown                                                                                                                                                        | <i>S. violaceoruber</i> B263 UFL,<br><i>S. albus</i> B262 UFL<br><i>S. badius</i> B192 UFL<br><i>Streptosporangium</i> sp. (AI-21). | N. C                               | MDRB &Pathogenic filamentous fungi | Sahara areas, south of Algeria      | [46]       |
| Actinomycin D                                                                                                                                                  |                                                                                                                                     | N. C                               | Anti-tumor and antibiotic          | Soil, Uttarakhand, India            | [47]       |
| Unknown                                                                                                                                                        | eighty-six actinomycete                                                                                                             | N. C                               | MDRB                               | Soil, Aquilla Safari, South Africa. | [48]       |
| Unknown                                                                                                                                                        | S. DV1S and GR9a-5                                                                                                                  | N. C                               | MDRB                               | Soil, Uttarakhand hills             | [49]       |
| <i>Cyclo</i> (S-Pro-S-Val)                                                                                                                                     | AGM12-1                                                                                                                             | Diketopiperazine                   | Anti-tumor properties              | Soil, Egypt                         | [50]       |
| Unknown                                                                                                                                                        | CA-02, CA-06, CA-07, and CA-17                                                                                                      | phenolic and flavonoid             | antioxidant activity               | Rhizosphere. Brazilian Caatinga     | [51]       |
| Unknown                                                                                                                                                        | <i>Kocuria kristinae</i> ,<br><i>Kocuria rosea</i> ,<br><i>S. griseus</i> ,<br><i>S. flaveolus</i><br>Actinobacteria                | N. C                               | MDRB &Pathogenic filamentous fungi | soil samples of Egypt               | [52]       |

Abbreviations: N.C: Not classified; MDRB, Multidrug resistant bacteria. S. *Streptomyces*, (PK) polyketide

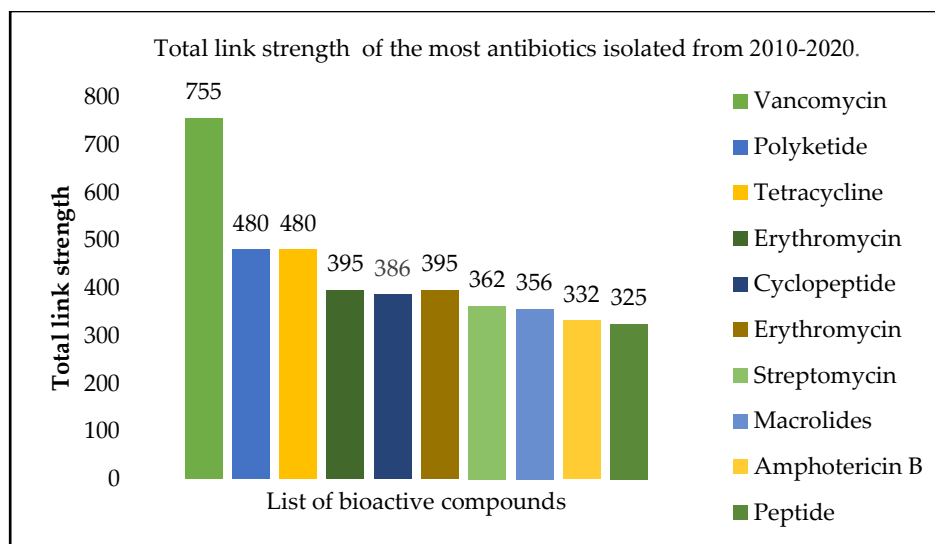

**Figure S1.** The spread of reviewed and cited papers based on the scattered keywords of the antimicrobial isolated from 2010-2020 from phylum Actinobacteria.

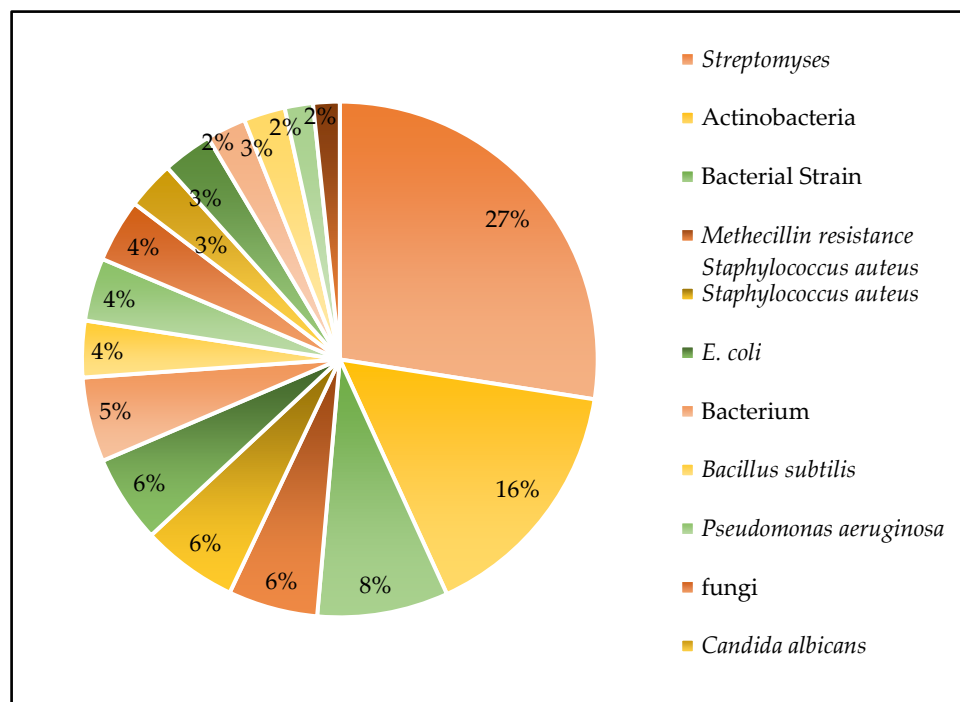

**Figure S2.** Percentage of diversity of keywords from the Scopus database for Actinobacteria, *Streptomyces*, natural products, primary, secondary metabolites, habitat effects of environments, pharmaceutical industry using VOSviewer software tool to analyse and visualise scientific literature.

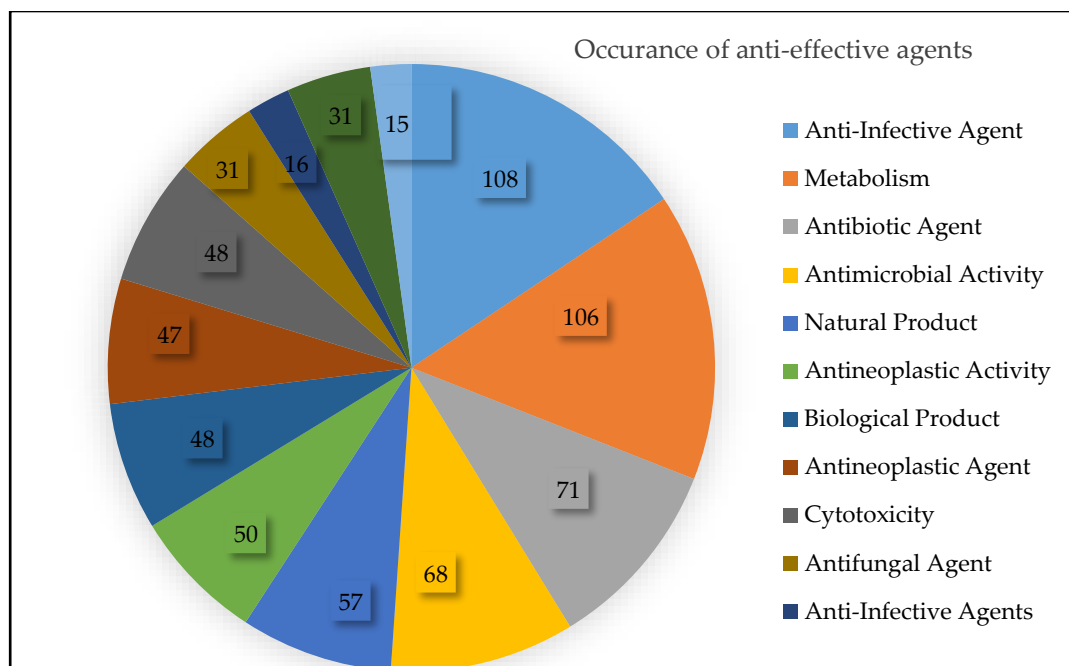

**Figure S3.** Spread of reviewed and cited papers based on the dispersed keywords of anti-infective agents' occurrence. Data was extracted using VOSviewer software to analyse and visualise scientific literature.

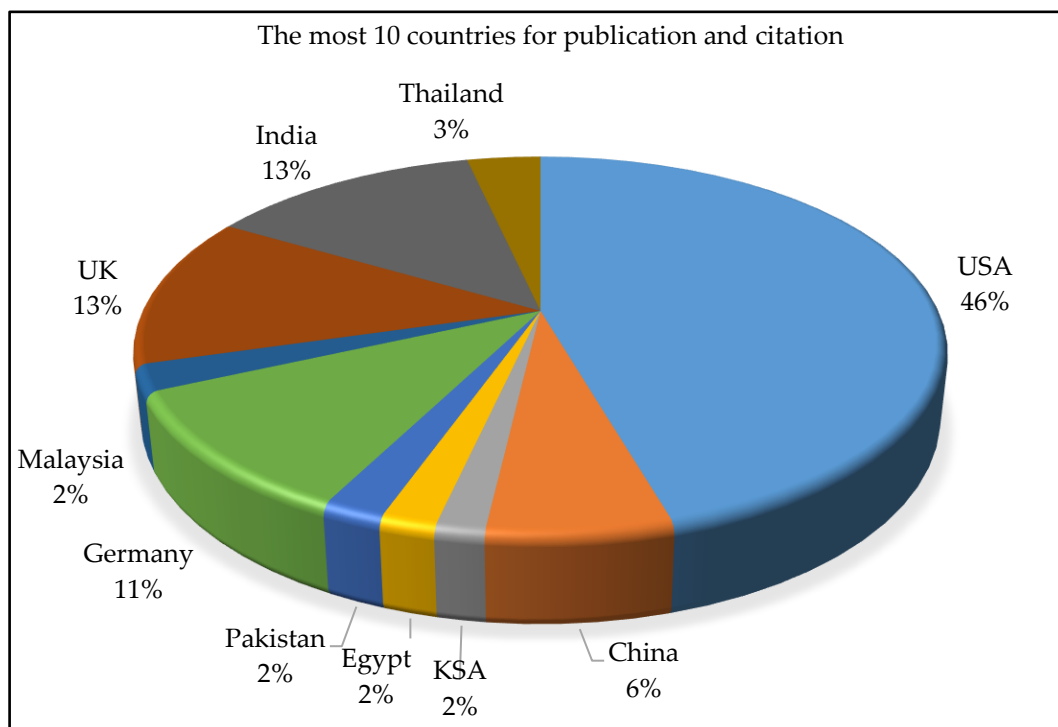

**Figure S4.** Spread of reviewed and cited papers based on the scattered keywords of the countries for the publication and citation. Data was extracted using VOSviewer software.

Abbreviations: N.C: Not classified; MDRB, Multidrug resistant bacteria. *S. Streptomyces*, (PK) polyketide
